1 **Title Page**

2

3 **Manuscript Title:** Short Report –Consumption of multiple sources of protein is associated with  
4 gestational diabetes mellitus in the Chinese population

5

6 **Authors:** Wei-Qin Wang,<sup>1</sup> Vic Shao-Chih Chiang<sup>2</sup>, Jing-Yuan Wen,<sup>3</sup> Ji-Fen Hu,<sup>4</sup> Rong-Xian Xu<sup>5\*</sup>

7

8 **Affiliation:**

9 <sup>1</sup> Unit of Nutrition, Fujian Province Cancer Hospital, Fuzhou, Fujian, China

10 <sup>2</sup> UCL Institute of Ophthalmology, University College London, 11-43 Bath Street, London  
11 EC1V 9EL, UK

12 <sup>3</sup> School of Pharmacy, Faculty of Medical and Health Science, The University of Auckland,  
13 Auckland, New Zealand

14 <sup>4</sup> First Affiliated Hospital, Fujian Medical University, Fuzhou, Fujian, China

15 <sup>5</sup> School of Public Health, Fujian Medical University, Fuzhou, Fujian, China

16

17 \* **Corresponding author:** Professor Rong-Xian Xu

18 Tel: 86 13023831963, 64 2108516764

19 Fax: 86 0591 22682003

20 Address: No.1 Xue Yuan Road, Shang Jie Town, Min Hou, Fuzhou, China

21 E-mail: rong1963cn@aliyun.com

22

23 **Keywords**

24 Pregnancy; Diet; Dairy; Seafood; Excess protein;

25

26

27

28 **Abstract**

29 **Background:** Gestational diabetes mellitus (GDM) is a hyperglycemic state during  
30 pregnancy that results in disruptions of insulin sensitivity and secretion. It affects 7% of  
31 all pregnancies and lead to adverse maternal and offspring outcomes. GDM has many  
32 risk factors, such as ethnicity special, hereditary. However Nutritional factors offer key  
33 strategies against GDM, but this is less characterized for the Chinese population.

34 **Methods:** A case control study of GDM pregnant women (n=49, 29.88±3.92 years of  
35 age) and healthy pregnant women (n=77, 27.63±4.83 years of age) from 1<sup>st</sup> Affiliated  
36 Hospital of Fujian Medical University were studied. Diagnosis was made using oral  
37 glucose tolerance test. Dietary data were collected using food frequency questionnaires.  
38 Data for use of dietary supplements, occupation, education, income, meal expenditure  
39 and smoking history were also recorded.

40 **Results:** No differences were found between GDM and control subjects for their age,  
41 education, occupation, monthly income, grocery expenditure and smoking (p>0.05).  
42 GDM subjects were associated with higher quantities of dairy products (p<0.05) and  
43 seafood (p<0.01) intake. There were also higher number of GDM subjects using protein  
44 powder supplementation (p<0.05).

45 **Conclusions:** Dietary recommendation guidelines for pregnant Chinese women should  
46 consider possible risks with excessive consumption of dairy products, seafood and  
47 protein powder. They should also assess the quality of the nutrition factor, other dietary  
48 interactions and their nutritional status further to minimize adverse outcomes caused by  
49 GDM .

50

51 **Introduction**

52 Gestational diabetes mellitus (GDM) is a state of hyperglycemia with onset or first  
53 identification during pregnancy (Farrar, *et al.*, 2015). It affects over 7% of all  
54 pregnancies and increases risks for maternal and perinatal mortality or health  
55 consequences later in life (Farrar, *et al.*, 2015).

56 This state of hyperglycemia presents symptoms of polyuria, polydipsia, polyphagia,  
57 weight loss and blurred vision (American Diabetes Association, 2014). Its diagnosis is  
58 evaluated based on glucose tests and its criteria threshold has been reviewed many times  
59 (Meek, *et al.*, 2015). GDM attributes to multifactorial pathophysiologies involving  $\beta$ -  
60 cell function, insulin signaling, pregnancy hormones and growth factors that result in  
61 disruptions of insulin sensitivity and secretion (Lappas, *et al.*, 2011). Several factors are  
62 known to increase risks of GDM such as family history of type 2 diabetes mellitus,  
63 maternal age and maternal body mass index (Teh, *et al.*, 2011). Well-established  
64 strategies against GDM include physical exercise, insulin therapy and oral medicating  
65 metformin (Artal, 2015,Zhao, *et al.*, 2015).

66 Nutritional factors offer key strategies to combat GDM including probiotics, *myo*-  
67 inositol, fibre, reduced energy intake and reduced glycemic load (Rogozinska, *et al.*,  
68 2015). However, there are limited amount of research surrounding this topic in the  
69 Chinese population. This is important because different ethnicities present disparities in  
70 GDM risks and outcomes (Chakkalakal, *et al.*, 2015). Dietary recommendations should  
71 therefore be customized for different ethnicities in order to optimize improve in the  
72 prevalence of GDM. This case-control study aimed to investigate food intake and  
73 dietary supplementation in Chinese GDM subjects.

74

## 75 **Methods**

### 76 *Overview*

77 The case control study included pregnant women that received prenatal physical  
78 examinations and awaits delivery at the 1<sup>st</sup> Affiliated Hospital of Fujian Medical  
79 University. The exclusive criteria were listed as follows: recent respiratory and urinary  
80 tract infections, external injuries, hemorrhage, other stress conditions, presence of  
81 tumors, transmissible diseases (e.g. tuberculosis, hepatitis B) and chronic diseases (e.g.  
82 connective tissue diseases). The subjects were divided into GDM group (n=49) and the  
83 control group (n=77) in a 1 to 1.5 ratio mismatched design. The study was approved by  
84 the Biomedical research Ethics Committee at Fujian Medical University ([2011] Fu Zi  
85 Medical Ethics Review (52)).

86

### 87 *Gestational Diabetes Mellitus Diagnosis*

88 The diagnosis of GDM was determined using 75g oral glucose intolerance test (OGTT)  
89 at fasting and post-challenge (one and two hours). GDM was identified if any of the  
90 OGTT measurements exceeded the specified threshold. These were: 5.1mmol/L  
91 (fasted), 10.0 mmol/L (one hour post-challenge) and 8.5 mmol/L (two hour post-  
92 challenge). These tests were conducted at gestational stage of approximately 24 weeks.

93

### 94 *Collection of Dietary Information*

95 The dietary habits of the subjects were investigated using food frequency  
96 questionnaires. The questionnaire was originated with guidance from the 2010 Chinese  
97 citizen nutrition and health status investigations for pregnant women. The questionnaire  
98 was composed of 11 major food types: staple foods, beans, vegetables, algae, fruits,  
99 dairy, meat, seafood, egg, snacks and beverages. Records were made for the frequency  
100 and quantity of consumption. The uses of dietary supplements were also recorded.  
101 Further records were taken for possible confounders: age, occupation, education,  
102 income, meal expenditure and smoking history.

103

104 *Statistical Analysis*

105 The data were statistically analyzed using SPSS statistics 17 software. Using t-tests, the  
106 differences in the consumption of various food types and dietary supplements were  
107 compared. Chi square tests were performed for comparisons of the potential  
108 confounding variables.

109

110

111 **Results**

112 There were no differences between GDM and control subjects in potential confounding  
113 variables ( $p>0.05$ ): age, location, education, occupation, monthly income, grocery  
114 expenditure and smoking (Table 1). In general, the recruited subjects were 29 years of  
115 age, living in city area and -received secondary or undergraduate education. In terms of  
116 occupation, most were company clerks or stays at home, with income generally over  
117 6000 CNY per month. In terms of meal expenditure, 10 – 30% of -income for most of  
118 them goes towards this expense. The recruited subjects were overall non-smokers.

119 The average daily intake of different food types between GDM and control subjects  
120 were recorded (Table 2). In terms of dairy consumption, GDM subjects ( $301.37\pm$   
121  $235.46$ ) had higher average daily consumption than control subjects ( $188.72\pm168.25$ )  
122 ( $p<0.05$ ). Higher consumption were also observed for seafood -in GDM subjects  
123 ( $158.03\pm168.36$ ) compared to control subjects ( $100.25\pm60.51$ ) ( $p<0.01$ ). No differences  
124 were found for other food types that were recorded ( $p>0.05$ ).

125 The use of different dietary supplements in both GDM and control subjects were  
126 recorded (Table 3). Supplementation with protein powder was associated with GDM  
127 ( $p<0.05$ ). Other dietary supplements that were utilized were not different between GDM  
128 and control subjects ( $p>0.05$ ).

129

130 **Discussion**

131 Recommendations for GDM need to be ethnicity-specific due to distinct risks  
132 (Chakkalakal, *et al.*, 2015). Nutrition is an imperative strategy to combat GDM  
133 (Rogozinska, *et al.*, 2015) and this case-control study aimed to investigate food intake  
134 and dietary supplementation in Chinese GDM subjects.

135 The association of dairy with GDM found in the present study is novel. However, it  
136 contradicts current recommendations to increase dairy intake for GDM prevention  
137 (Rono, *et al.*, 2014). Furthermore, a systematic review found dairy to benefit type 2  
138 diabetes (T2M), which has similar pathophysiology to GDM (Turner, *et al.*, 2015). It is  
139 important to note that the dairy in these studies were low-fat. Since high fat diet  
140 increases risks of GDM (Park, *et al.*, 2013), the incorporation of all types of dairy in the  
141 present study may have resulted in this contradiction.

142 Mediterranean diet is known to improve outcomes of GDM and it works in part through  
143 increasing seafood intake (Perez-Ferre, *et al.*, 2014). Data on seafood association with  
144 GDM is non-existent but the present study failed to concord with this rationale. This is  
145 may be due to the major issue of seafood contamination by toxic metals in China (Du,  
146 *et al.*, 2012). Some of these toxic metals have been previously associated with GDM  
147 (Romano, *et al.*, 2015), but these were not accounted for in the present study.

148 Low protein intake increases risk of GDM (Ignacio-Souza, *et al.*, 2013). Protein powder  
149 strategizes to solve this problem and has been found to improve T2M (Jakubowicz, *et*  
150 *al.*, 2014). In contrast, the present study found supplementation of protein powder to  
151 associate positively with GDM. This divergence may stem from the non-quantitative  
152 assessment of dietary supplement use. The dose is critically important as excessive  
153 supplementation in addition to whole food proteins may actually be counterproductive  
154 (Rehfeldt, *et al.*, 2014).

155 It is interesting to note that the nutritional associations found in the current study were  
156 all considered as major sources of protein (Bao, *et al.*, 2013). High protein diets have  
157 been systematically reviewed to benefit T2M (Dong, *et al.*, 2013). In saying that, this  
158 could not be further probed in this study since nutrient-based approaches were not  
159 adopted. This notion is complicated by its dependency on the type of protein because  
160 animal protein demonstrates greater GDM risk to vegetable proteins (Bao, *et al.*, 2013).

161 Caveats should likewise be taken that substantial ancillary protein intake in protein-  
162 sufficient subjects would *de facto* be detrimental.

163 Limitations of this study include its sample size of GDM cases and the above mentioned  
164 characterization of nutritional items. Nonetheless, it addresses important nutritional  
165 considerations to oppose GDM in the limitedly investigated Chinese population, to offer  
166 grounding for future research. The nutritional items investigated should be more defined  
167 in future research includes: low fat products, metal contamination, dietary  
168 supplementation dose and overall macronutrient intake. The nutritional status of the  
169 subjects should be similarly considered.

170

## 171 **Conclusion**

172 Since risks of GDM are ethnicity-dependent (Chakkalakal, *et al.*, 2015), dietary  
173 recommendations need to be more tailored to different ethnicities. The consumption of  
174 dairy, seafood and protein powder needs attention for pregnant Chinese women.  
175 Considerations need to be made for the nutritional status, fat content, metal  
176 contamination, quantity and balance with other dietary intakes. GDM affects the 1  
177 pregnancies (Farrar, *et al.*, 2015) and diet offers crucial GDM strategies to reduce the  
178 subsequent GDM health complications and mortalities (Rogozinska, *et al.*, 2015).

179

180

181



182 **Acknowledgements**

183 The authors would like to thank the participation of pregnant women and the assistance  
184 of the nurses at the obstetric ward.

185

186 **Conflict of interests, sources of funding and authorship**

187 The authors declare that they have no competing interests.

188 This study was supported by Fujian Province Natural Science Fund 2012-2014.

189 Rong-xian Xu was in charge of the study design and funding applications. Wei-Qin

190 Wang conducted the study, facilitated data collection, data analyses and report-writing.

191 Vic Shao-Chih Chiang and Jing-Yuan Wen wrote and reviewed the manuscripts. Ji-Fen

192 Hu managed the nurses for subject recruitments.

193

194 **References**

- 195 American Diabetes Association, (2014) Diagnosis and classification of diabetes  
196 mellitus. *Diabetes Care* **37**, 81 - 90.
- 197 Artal, R., (2015) The role of exercise in reducing the risks of gestational diabetes  
198 mellitus in obese women. *Best Pract Res Clin Obstet Gynaecol* **29**, 123 - 132.
- 199 Bao, W., Bowers, K., Tobias, D.K., Hu, F.B. & Zhang, C., (2013) Prepregnancy dietary  
200 protein intake, major dietary protein sources, and the risk of gestational diabetes  
201 mellitus. *Diabetes Care* **36**, 2001 - 2008.
- 202 Chakkalakal, R.J., Gebretsadik, T., Jagasia, S., Shintani, A. & Elasy, T.A., (2015)  
203 Variation in the relationship between gestational diabetes diagnosis and total gestational  
204 weight gain by race/ethnicity. *Diabetes Res Clin Pract.*
- 205 Dong, J.Y., Zhang, Z.L., Wang, P.Y. & Win, L.Q., (2013) Effects of high-protein diets  
206 on body weight, glycaemic control, blood lipids and blood pressure in type 2 diabetes:  
207 meta-analysis of randomised controlled trials. *Br J Nutr* **110**, 781 - 789.
- 208 Du, Z.Y., Zhang, J., Wang, C., Li, L., Man, Q., Lundebye, A.K. & Froyland, L., (2012)  
209 Risk–benefit evaluation of fish from Chinese markets: Nutrients and contaminants in 24  
210 fish species from five big cities and related assessment for human health. *Sci Total*  
211 *Environ* **416**, 187 - 199.
- 212 Farrar, D., Duley, L., Medley, N. & Lawlor, D.A., (2015) Different strategies for  
213 diagnosing gestational diabetes to improve maternal and infant health. *Cochrane Libr.*
- 214 Ignacio-Souza, L.M., Reis, S.R., Arantes, V.C., Botosso, B.L., Veloso, R.V., Ferreira,  
215 F., Boschero, A.C., Carneiro, E.M., de Barros Reis, M.A. & Latorraca, M.Q., (2013)  
216 Protein restriction in early life is associated with changes in insulin sensitivity and  
217 pancreatic beta-cell function during pregnancy. *Br J Nutr* **109**, 236 - 247.
- 218 Jakubowicz, D., Froy, O., Ahren, B., Boaz, M., Landau, Z., Bar-Dayana, Y., Ganz, T.,  
219 Barnea, M. & Wainstein, J., (2014) Incretin, insulinotropic and glucose-lowering effects  
220 of whey protein pre-load in type 2 diabetes: a randomised clinical trial. *Diabetologia* **57**,  
221 1807 - 1811.
- 222 Lappas, M., Hiden, U., Desoye, G., Froehlich, J., Mouzon, S.H. & Jawerbaum, A.,  
223 (2011) The role of oxidative stress in pathophysiology of gestational diabetes mellitus.  
224 *Antioxid Redox Signal* **15**.
- 225 Meek, C.L., Lewis, H.B., Patient, C., Murphy, H.R. & Simmons, D., (2015) Diagnosis  
226 of gestational diabetes mellitus: falling through the net. *Diabetologia*.

- 227 Park, S., Kim, M.Y., Baik, S.H., Woo, J.T., Kwon, Y.J., Daily, J.W., Park, Y.M., Yang,  
228 J.H. & Kim, S.H., (2013) Gestational diabetes is associated with high energy and  
229 saturated fat intakes and with low plasma visfatin and adiponectin levels independent of  
230 prepregnancy BMI. *Eur J Clin Nutr* **67**, 196 - 201.
- 231 Perez-Ferre, N., Valle, L.D., Torrejon, M.J., Barca, I., Calvo, M.I., Matia, P., Rubio,  
232 M.A. & Calle-Pascual, A.L., (2014) Diabetes mellitus and abnormal glucose tolerance  
233 development after gestational diabetes: A three-year, prospective, randomized, clinical-  
234 based, Mediterranean lifestyle interventional study with parallel groups. *Clin Nutr*.
- 235 Rehfeldt, C., Lang, I.S., Gors, S., Hennig, U., Kalbe, C., Stabenow, B., Brussow, K.P.,  
236 Pfuhl, R., Bellmann, O., Nurnberg, G., Ottenll, W. & Metges, C.C., (2014) Limited and  
237 excess dietary protein during gestation affects growth and compositional traits in gilts  
238 and impairs offspring fetal growth. *J Anim Sci* **89**, 329 - 341.
- 239 Rogozinska, E., Chamillard, M., Hitman, G.A., Khan, K.S. & Thangaratinam, S., (2015)  
240 Nutritional manipulation for the primary prevention of gestational diabetes mellitus: a  
241 meta-analysis of randomised studies. *PLoS ONE* **10**, e0115526.
- 242 Romano, M.E., Enquobahrie, D.A., Simpson, C.D., Checkoway, H. & Williams, M.A.,  
243 (2015) A case-control study of cadmium body burden and gestational diabetes mellitus  
244 in American women. *Environ Health Perspect*.
- 245 Rono, K., Stach-Lempinen, B., Klemetti, M.M., Kaaja, R.J., Poyhonen-Alho, M.,  
246 Eriksson, J.G. & Koivusalo, S.B., (2014) Prevention of gestational diabetes through  
247 lifestyle intervention: study design and methods of a Finnish randomized controlled  
248 multicenter trial (RADIEL). *BMC Pregnancy and Childbirth* **14**.
- 249 Teh, W.T., Teede, H.J., Paul, E., Harrison, C.L., Wallace, E.M. & Allan, C., (2011)  
250 Risk factors for gestational diabetes mellitus: Implications for the application of  
251 screening guidelines. *Aust N Z J Obstet Gynaecol* **51**, 26 - 30.
- 252 Turner, K.M., Keogh, J.B. & Clifton, P.M., (2015) Dairy consumption and insulin  
253 sensitivity: A systematic review of short- and long-term intervention studies. *Nutr*  
254 *Metab Cardiovasc Dis* **25**, 3 - 8.
- 255 Zhao, L., Sheng, X., Zhou, S., Yang, T., Ma, L., Zhou, Y. & Cui, Y., (2015) Metformin  
256 versus insulin for gestational diabetes mellitus: a meta-analysis. *Br J Clin Pharmacol*.
- 257

258 **Tables**

259 **Table 1 Social background of recruited subjects**

|                                    | GDM (n=49)   | Control (n=77) | P-value |
|------------------------------------|--------------|----------------|---------|
| Age                                | 29.88 ± 3.92 | 27.63 ± 4.83   | 0.264   |
| Location                           |              |                | 0.825   |
| Sea Coast                          | 2(1.6%)      | 3(2.4%)        |         |
| Rural                              | 9(7.1%)      | 11(8.7%)       |         |
| Urban                              | 38(30.2%)    | 63(50.0%)      |         |
| Education                          |              |                | 0.989   |
| Elementary                         | 1(0.8%)      | 2(1.6%)        |         |
| Intermediate                       | 9(7.1%)      | 12(9.5%)       |         |
| Secondary                          | 11(8.7%)     | 18(14.3%)      |         |
| Undergraduate                      | 25(19.8%)    | 39(31.0%)      |         |
| Postgraduate                       | 3(2.4%)      | 6(4.8%)        |         |
| Occupation                         |              |                | 0.888   |
| Civil Service                      | 1(0.8%)      | 2(1.6%)        |         |
| Company Clerk                      | 14(11.1%)    | 22(17.5%)      |         |
| Professionals                      | 9(7.1%)      | 16(12.7%)      |         |
| Worker/ Service                    | 1(0.8%)      | 0(0%)          |         |
| At-Home                            | 18(14.3%)    | 28(22.2%)      |         |
| Other                              | 6(4.8%)      | 9(7.1%)        |         |
| Monthly Income                     |              |                | 0.816   |
| ≤ 3000 CNY                         | 1(0.8%)      | 2(1.6%)        |         |
| 3000 - 6000                        | 11(8.7%)     | 15(11.9%)      |         |
| ≥6000 CNY                          | 36(29.4%)    | 60(47.6%)      |         |
| Meal Expenditure (Ratio to Income) |              |                | 0.191   |
| < 10%                              | 7(5.6%)      | 4(2.4%)        |         |
| 10 - 30%                           | 35(28.6%)    | 61(48.4%)      |         |
| 30 - 50%                           | 5(4.0%)      | 11(8.7%)       |         |
| > 50%                              | 1(0.8%)      | 2(1.6%)        |         |
| Smoking History                    |              |                | 0.126   |
| Yes                                | 1(0.8%)      | 4(3.2%)        |         |
| No                                 | 48(38.1%)    | 73(57.9%)      |         |
| Secondhand Smoke                   |              |                | 0.124   |
| Yes                                | 4(3.2%)      | 15(11.9%)      |         |
| No                                 | 45(35.7%)    | 62(49.2%)      |         |

261 Table 2 Average daily intake of different food types of recruited subjects

| Food Type       | GDM (n=49)    | Control (n=77) | P-value  |
|-----------------|---------------|----------------|----------|
| Staple food (g) | 356.95±110.62 | 367.40±94.66   | 0.450    |
| Beans (g)       | 25.10±19.42   | 29.78±38.37    | 0.253    |
| Vegetables (g)  | 254.65±140.44 | 275.14±148.34  | 0.513    |
| Algae (g)       | 35.22±24.67   | 28.29±23.18    | 0.254    |
| Fruit (g)       | 493.31±260.01 | 628.40±292.20  | 0.581    |
| Dairy (g)       | 301.37±235.46 | 188.72±168.25  | 0.032 *  |
| Meat (g)        | 132.47±96.19  | 102.70±74.40   | 0.167    |
| Seafood (g)     | 158.03±168.36 | 100.25±60.51   | 0.007 ** |
| Egg (g)         | 52.90±29.74   | 45.97±26.26    | 0.566    |
| Snacks (g)      | 88.63±70.18   | 97.72±80.06    | 0.684    |
| Beverages (g)   | 8.70±19.07    | 20.01±79.91    | 0.135    |

262 Statistical significance of difference between GDM and control \* p<0.05; \*\* p<0.01

263

264 Table 3 Use of different dietary supplements by recruited subjects

|                       | GDM (n=49) | Control (n=77) | P-value |
|-----------------------|------------|----------------|---------|
| <b>Folic acid</b>     |            |                | 0.483   |
| Yes                   | 32(27.1%)  | 61(51.7%)      |         |
| No                    | 11(9.3%)   | 14(11.9%)      |         |
| <b>Iron</b>           |            |                | 0.094   |
| Yes                   | 8(6.8%)    | 25(21.2%)      |         |
| No                    | 35(29.7%)  | 50(42.4%)      |         |
| <b>Calcium</b>        |            |                | 0.287   |
| Yes                   | 34(28.8%)  | 66(55.9%)      |         |
| No                    | 9(7.6%)    | 9(7.6%)        |         |
| <b>Multivitamin</b>   |            |                | 1.000   |
| Yes                   | 24(20.3%)  | 43(36.4%)      |         |
| No                    | 19(16.1%)  | 32(27.1%)      |         |
| <b>Formula milk</b>   |            |                | 0.413   |
| Yes                   | 8(6.7%)    | 12(10.2%)      |         |
| No                    | 35(29.7%)  | 63(53.4%)      |         |
| <b>Protein powder</b> |            |                | 0.011*  |
| Yes                   | 7(5.9%)    | 2(1.7%)        |         |
| No                    | 36(30.5%)  | 73(61.9%)      |         |
| <b>Bird's nest</b>    |            |                | 0.157   |
| Yes                   | 0(0%)      | 5(4.2%)        |         |
| No                    | 43(36.4%)  | 70(59.3%)      |         |
| <b>Honey</b>          |            |                | 0.364   |
| Yes                   | 1(0.8%)    | 0(0%)          |         |
| No                    | 42(35.6%)  | 75(63.6%)      |         |

265 Statistical significance of difference between GDM and control \* p<0.05

266
